# Supplementary material for: TERT Expression Induces Resistance to BRAF and MEK Inhibitors in BRAF-Mutated Melanoma In Vitro
Source: MDPI journal article supplement (doi:10.3390/cancers15112888), 2023-05-24
Supplement: s1 [file s1]

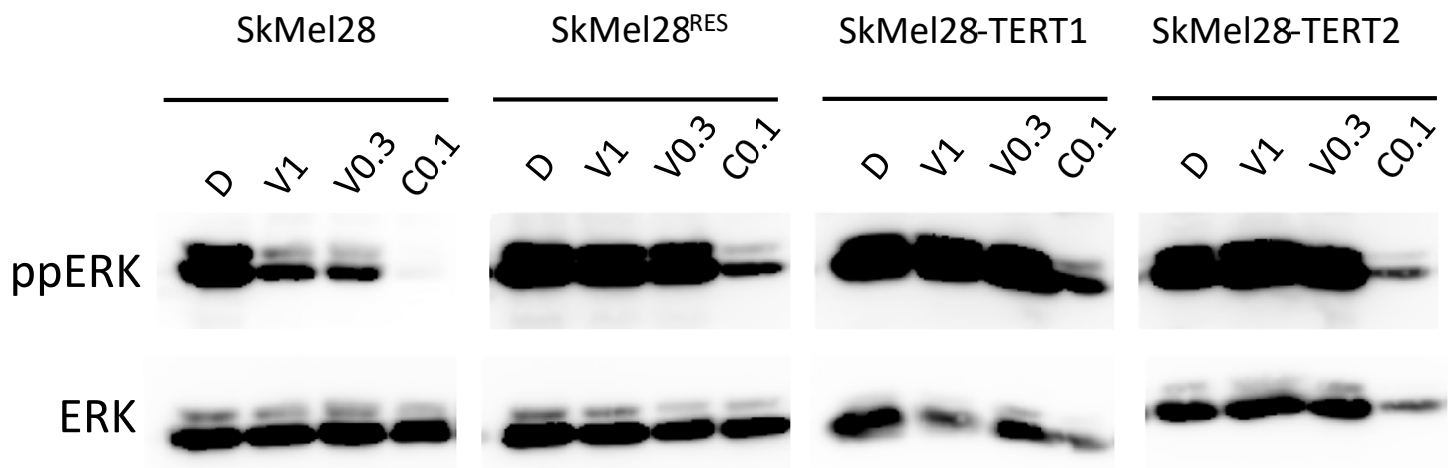

**Supplementary Figure S1:** TERT over-expression is associated with decreased sensitivity to BRAF and MEK inhibition. The indicated cells were treated for 24 h with DMSO, vemurafenib 1 μM (V1) or 0.3 μM (V0.3) or cobimetinib 0.1 μM (C0.1) and the expressions of phosphorylated ERK and total ERK were assessed by Western blotting.

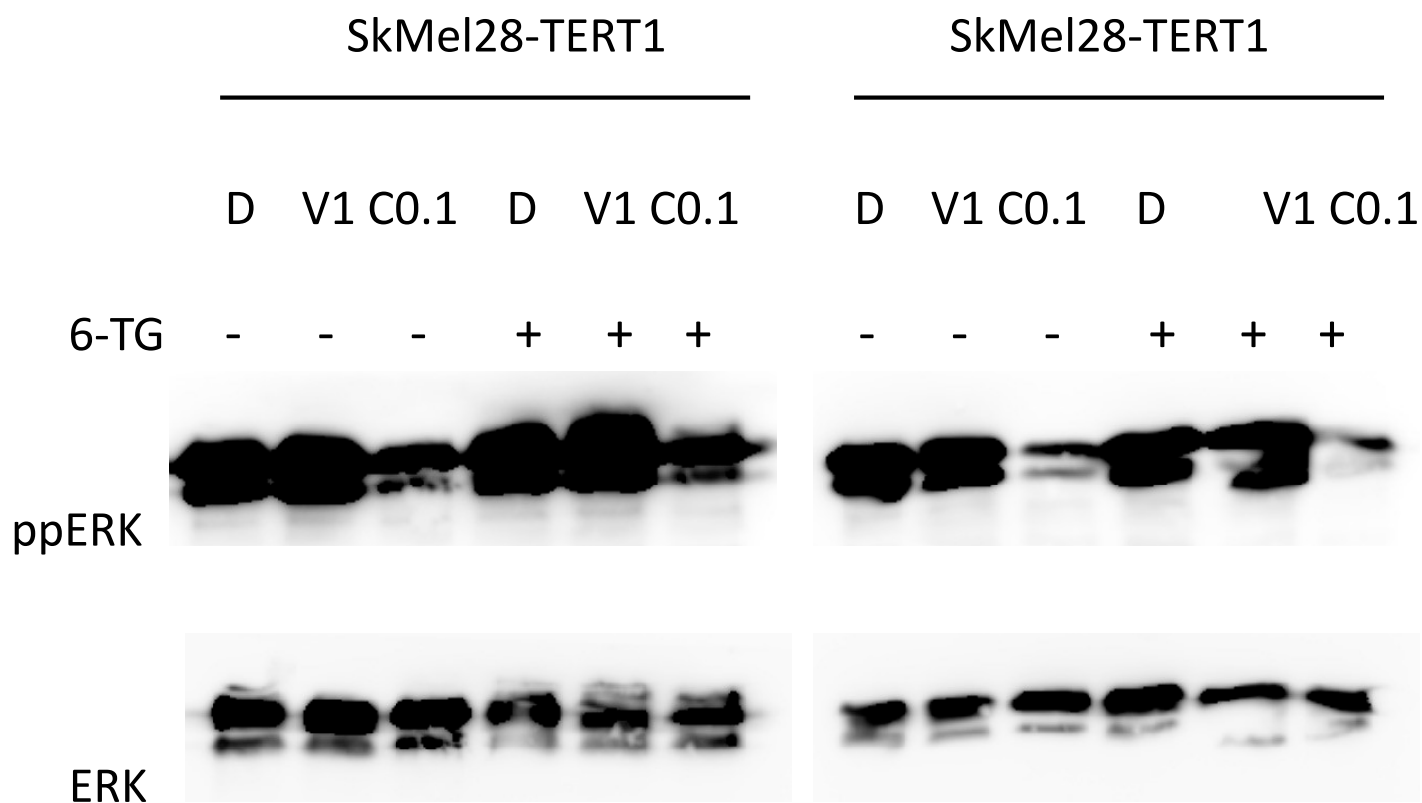

**Supplementary Figure S2:** The treatment with 6-thio-dG does not reduce ERK activation in cells treated with BRAFi or MEKi. The indicated cells were treated for 24 h with DMSO, vemurafenib 1  $\mu$ M (V1), cobimetinib 0.1  $\mu$ M (C0.1), 6-thio-dG 10  $\mu$ M (6-TG) or the combination of inhibitors and the expressions of phosphorylated ERK and total ERK were assessed by Western blotting.

**Supplementary Table S1: Tumor samples' characteristics**

| Patient id | BRAF/NRAS mutation status* | TERT promoter mutation | Relative mRNA TERT expression | BRAF and MEK inhibitors               | PFS (months) |
|------------|----------------------------|------------------------|-------------------------------|---------------------------------------|--------------|
| 1442       | BRAF V600R                 | -124 C>T               | NA                            | Dabrafenib, trametinib                | 7,2          |
| 1865       | BRAF V600E                 | -146C>T                | NA                            | Pembrolizumab, dabrafenib, trametinib | 2,6          |
| 1797       | BRAF V600E                 | -124C>T                | 3,93                          | Vemurafenib, cobimetinib              | 4            |
| 1008       | BRAF V600E NRAS Q61R       | -124 C>T               | 111,71                        | Vemurafenib, cobimetinib              | 13,8         |
| 1217       | BRAF V600E                 | -124 C>T               | 231,89                        | Dabrafenib, trametinib                | 5            |
| 768        | BRAF V600E                 | -124 C>T               | 62,42                         | Dabrafenib, trametinib                | 8,5          |
| 1171       | BRAF V600K                 | -124 C>T               | NA                            | Vemurafenib, cobimetinib              | 37           |
| 1199       | BRAF V600E                 | WT                     | NA                            | Dabrafenib, trametinib                | 5,6          |
| 563        | BRAF V600E                 | -124 C>T               | NA                            | Dabrafenib, trametinib                | 35,3         |
| 618        | BRAF V600E                 | -124 C>T               | 29,92                         | Dabrafenib, trametinib                | 73,9         |
| 1807       | BRAF V600E                 | -124C>T                | NA                            | Dabrafenib, trametinib                | 7            |
| 1313       | BRAF V600E                 | -146 C>T               | NA                            | Vemurafenib, cobimetinib              | 4            |
| 1858       | BRAF V600E                 | -124C>T                | NA                            | Dabrafenib, trametinib                | 4            |
| 1102       | BRAF V600E                 | -124 C>T               | NA                            | Vemurafenib, cobimetinib              | 3,2          |
| 1555       | BRAF V600E                 | -146 C>T               | NA                            | Dabrafenib, trametinib                | 28           |
| 1196       | BRAF V600E                 | WT                     | 36,47                         | Dabrafenib, trametinib                | 11,1         |
| 1627       | BRAF V600E                 | -146 C>T               | NA                            | Dabrafenib, trametinib                | 11,3         |
| 857        | BRAF V600K                 | -139-138 CC>TT         | 375,84                        | Dabrafenib, trametinib                | 3,9          |
| 1416       | BRAF V600E                 | -139-138 CC>TT         | NA                            | Dabrafenib, trametinib                | 9,1          |
| 1822       | BRAF V600E                 | -124 C>T               | NA                            | Dabrafenib, trametinib                | 2            |
| 1368       | BRAF V600E                 | WT                     | NA                            | Dabrafenib, trametinib                | 23,6         |
| 1831       | BRAF V600E                 | -124 C>T               | NA                            | Dabrafenib, trametinib                | 30           |
| 1504       | BRAF V600E                 | -124 C>T               | 1,23                          | Vemurafenib, cobimetinib              | 4,2          |
| 1016       | BRAF V600E                 | -124 C>T               | NA                            | Dabrafenib, trametinib                | 24           |
| 926        | BRAF V600K                 | -146 C>T               | 293,82                        | Dabrafenib, trametinib                | 3,4          |
| 1746       | BRAF V600K                 | -146 C>T               | 58,97                         | Dabrafenib, trametinib                | 13           |
| 1090       | BRAF V600E                 | -124 C>T               | 3,79                          | Vemurafenib, cobimetinib              | 3,9          |
| 1833       | BRAF V600E                 | WT                     | NA                            | Dabrafenib, trametinib                | 13,8         |
| 1903       | BRAF V600E                 | -146 C>T               | 0,07                          | Dabrafenib, trametinib                | 3,1          |
| 1838       | BRAF V600E                 | -146C>T                | NA                            | Pembrolizumab, dabrafenib, trametinib | 20,8         |
| 1447       | BRAF V600E                 | -146 C>T               | NA                            | Dabrafenib, trametinib                | 2,8          |
| 1316       | BRAF V600E                 | -124 C>T               | 277,55                        | Dabrafenib, trametinib                | 1,1          |
| 1427       | BRAF V600E                 | -146 C>T               | NA                            | Dabrafenib, trametinib                | 3,2          |
| 1870       | BRAF V600E                 | -139_138 CC>TT         | NA                            | Dabrafenib, trametinib                | 3,1          |
| 1783       | BRAF V600E                 | WT                     | NA                            | Dabrafenib, trametinib                | 13           |
| 1455       | BRAF V600E                 | -125-124 CC>TT         | NA                            | Vemurafenib, cobimetinib              | 4,8          |
| 1854       | BRAF V600E                 | -124C>T                | NA                            | Dabrafenib, trametinib                | 3,5          |
| 1579       | BRAF V600E                 | -124 C>T               | 153,52                        | Vemurafenib, cobimetinib              | 1,9          |
| 1353       | BRAF V600E NRAS Q61H       | -124 C>T               | NA                            | Vemurafenib, cobimetinib              | 2,8          |
| 1074       | BRAF V600E                 | -124 C>T               | NA                            | Encorafenib, binimetinib              | 23,7         |
| 707        | BRAF V600K                 | -146 C>T               | NA                            | Dabrafenib, trametinib                | 6,2          |
| 664        | BRAF V600E                 | -125-124 CC>TT         | 405,04                        | Dabrafenib, trametinib                | 7,7          |
| 1363       | BRAF V600E                 | -146 C>T               | NA                            | Dabrafenib, trametinib                | 37,9         |
| 1413       | BRAF V600E                 | -124 C>T               | NA                            | Dabrafenib, trametinib                | 2,8          |
| 1863       | BRAF V600E                 | -146C>T                | NA                            | Pembrolizumab, dabrafenib, trametinib | 5,3          |
| 1800       | BRAF V600E                 | -124C>T                | 0                             |                                       |              |
| 1850       | BRAF V600K                 | -146C>T                | 0                             |                                       |              |
| 1805       | BRAF V600E                 | -146C>T                | 1453                          |                                       |              |

\* NRAS is wild type unless otherwise specified; NA, not available (missing samples); PFS, progression free survival upon treatment with BRAF/MEK inhibitors; WT, wild type
