# Supplementary material for: TERT Expression Induces Resistance to BRAF and MEK Inhibitors in BRAF-Mutated Melanoma In Vitro
Source: MDPI journal article supplement (doi:10.3390/cancers15112888), 2023-05-24
Supplement: s1 [file s1]

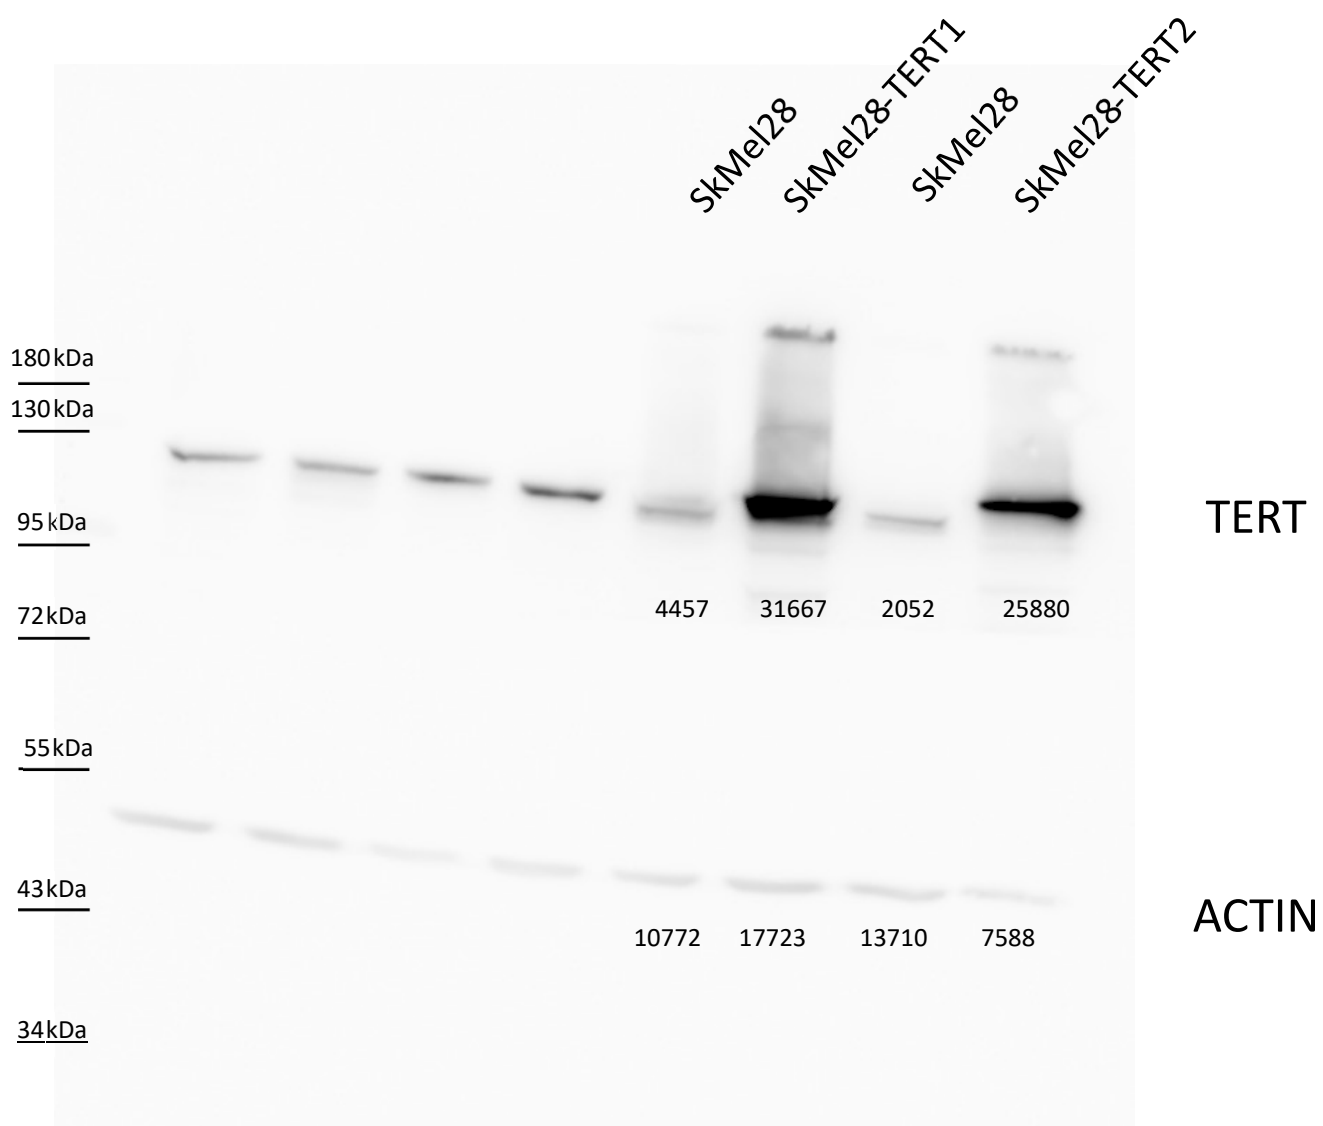

**Figure 3A.** Uncropped Western blot bands for Figure 3A. Quantification of western blots by ImageJ is indicated below the blot.

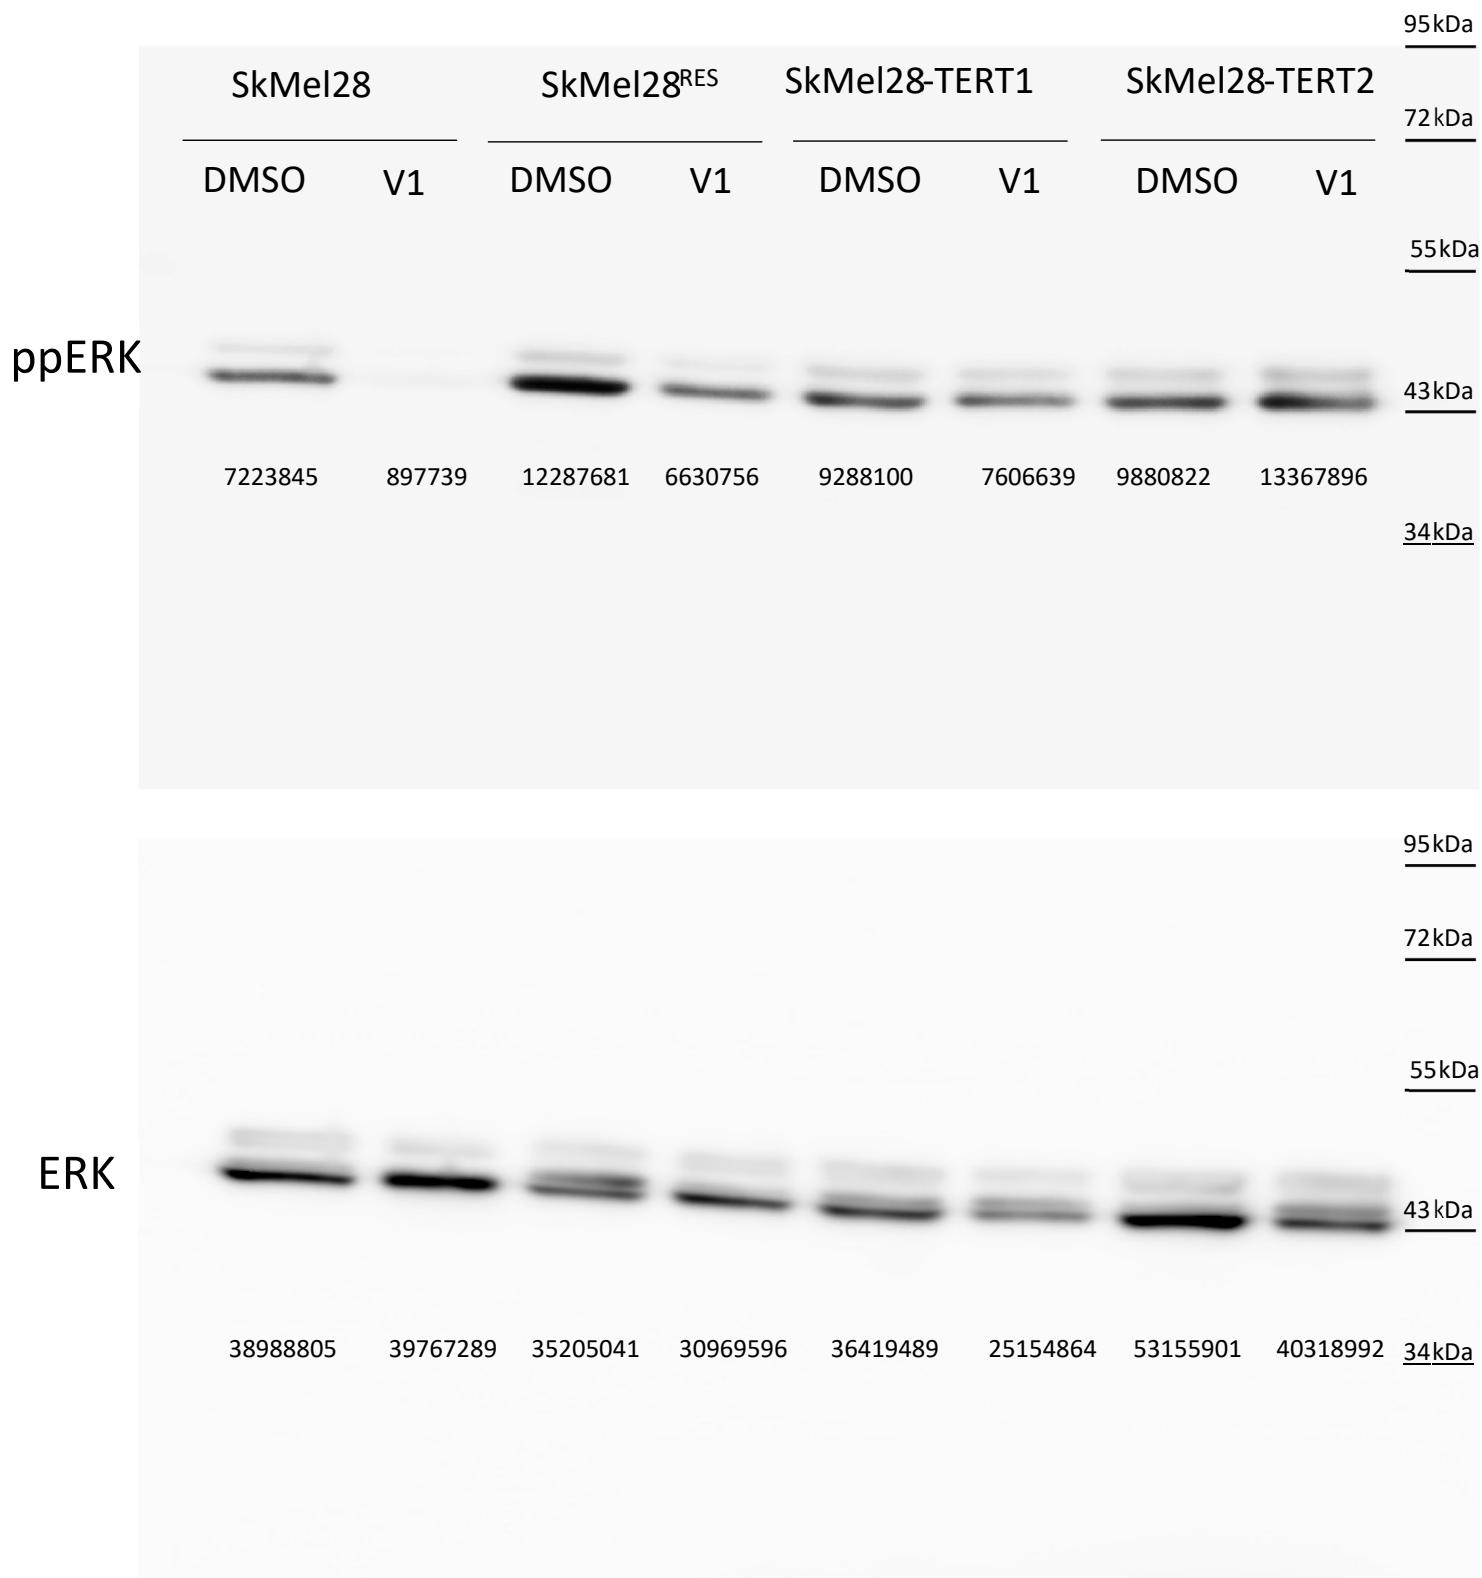

**Figure 3E.** Uncropped Western blot bands for Figure 3E. Quantification of western blots by ImageJ is indicated below each blot.

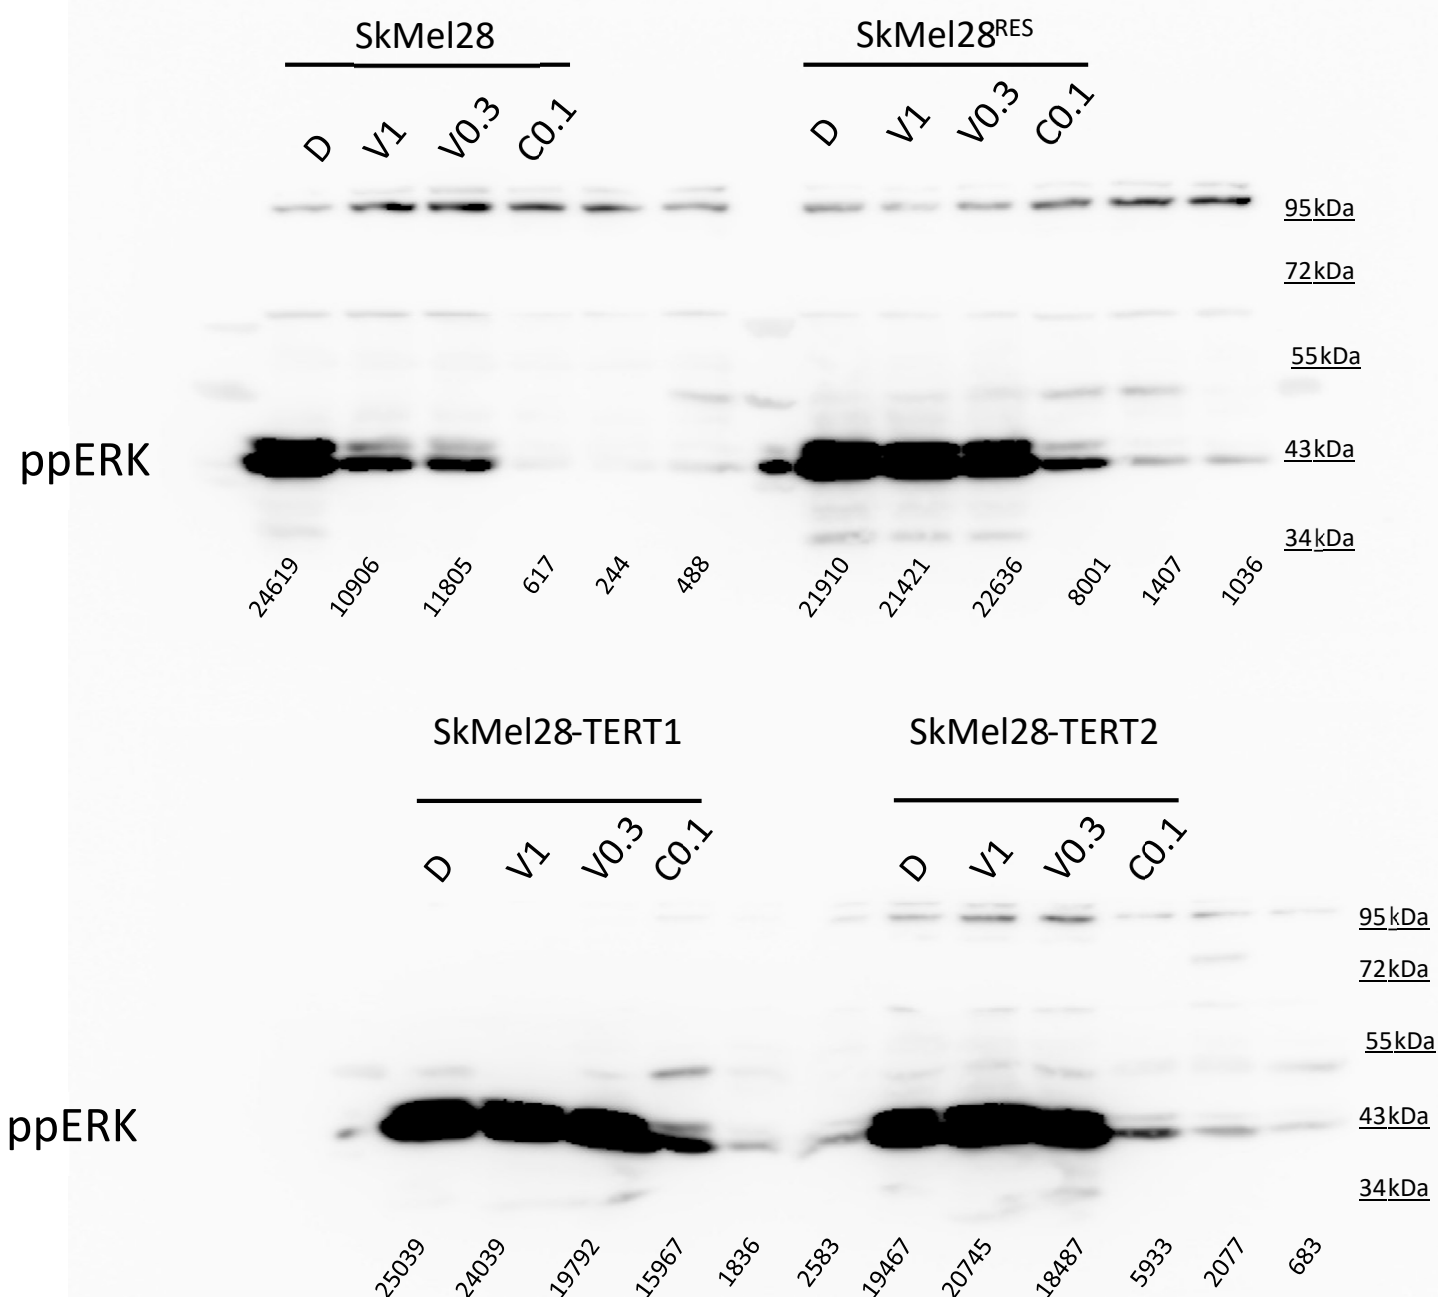

**Supplementary Figure 1:** Uncropped Western blot bands for Figure S1. Quantification of western blots by ImageJ is indicated below each blot.

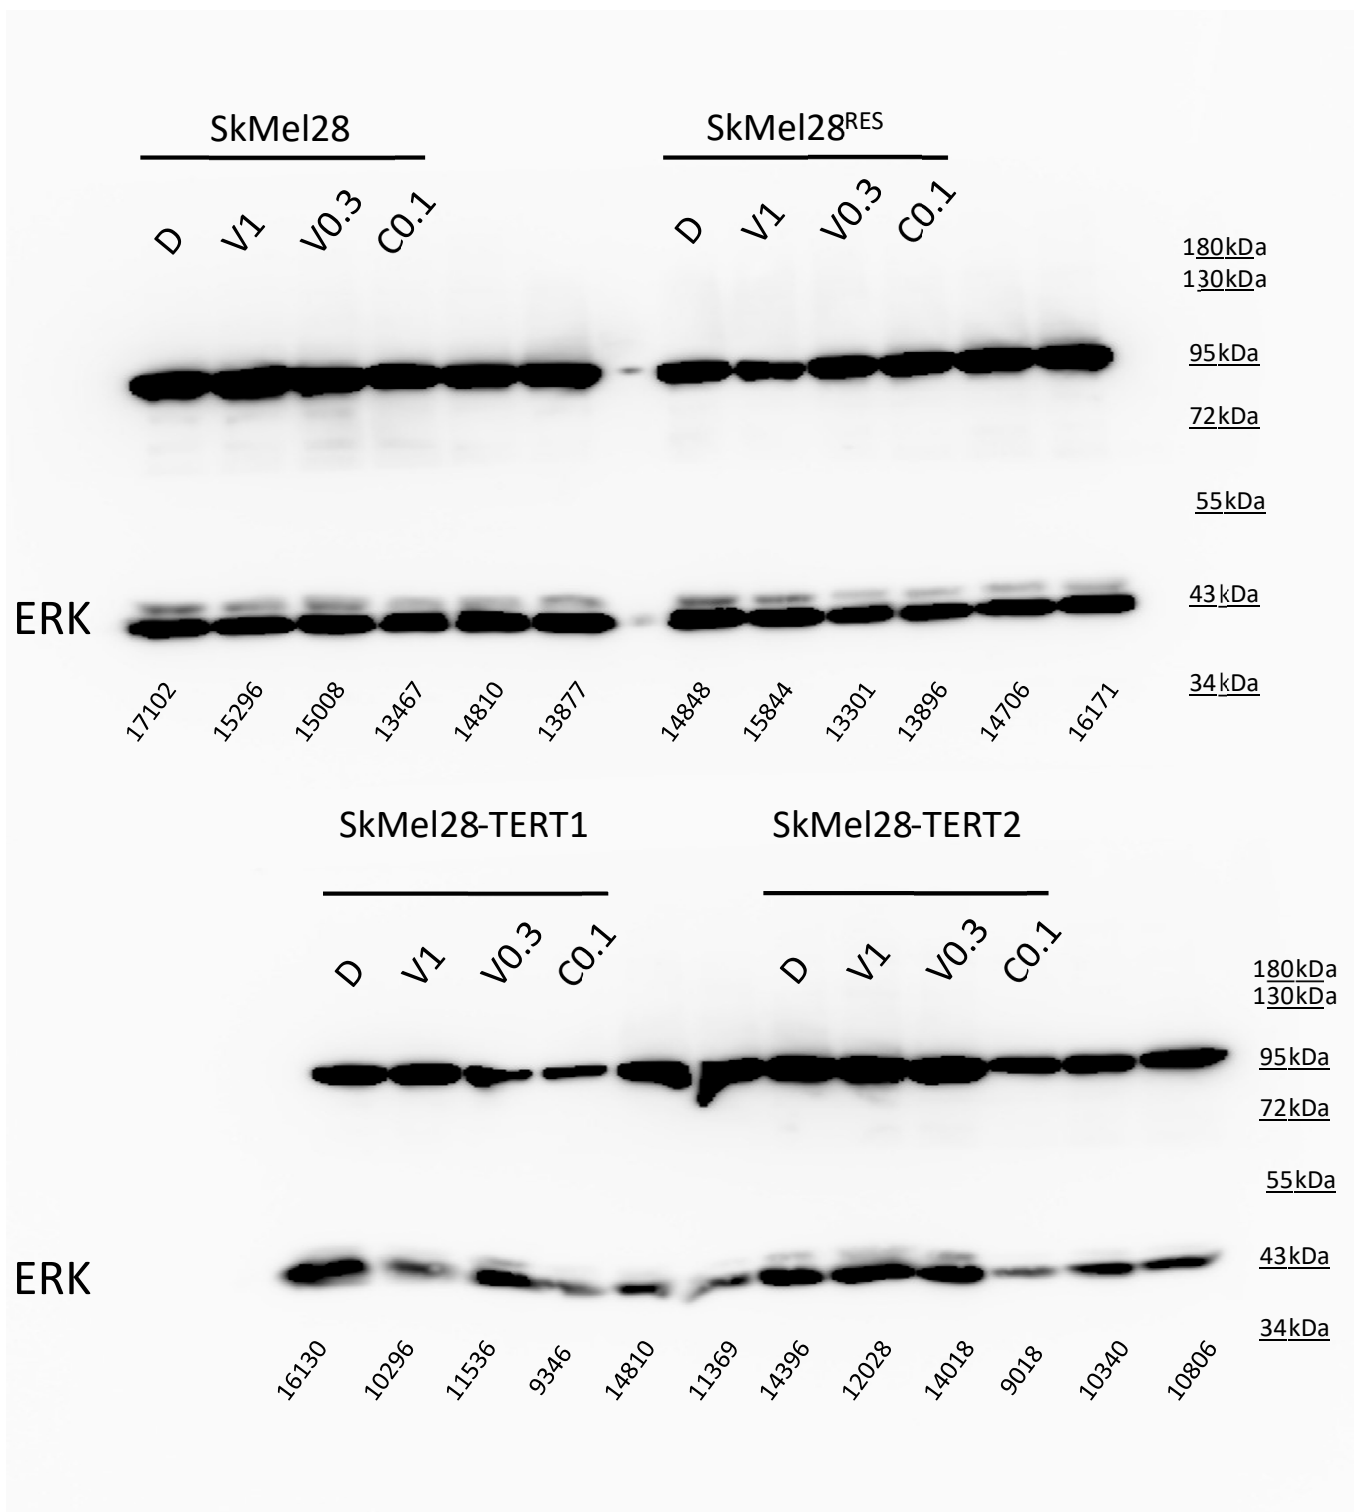

**Supplementary Figure 1:** Uncropped Western blot bands for Figure S1. Quantification of western blots by ImageJ is indicated below each blot.

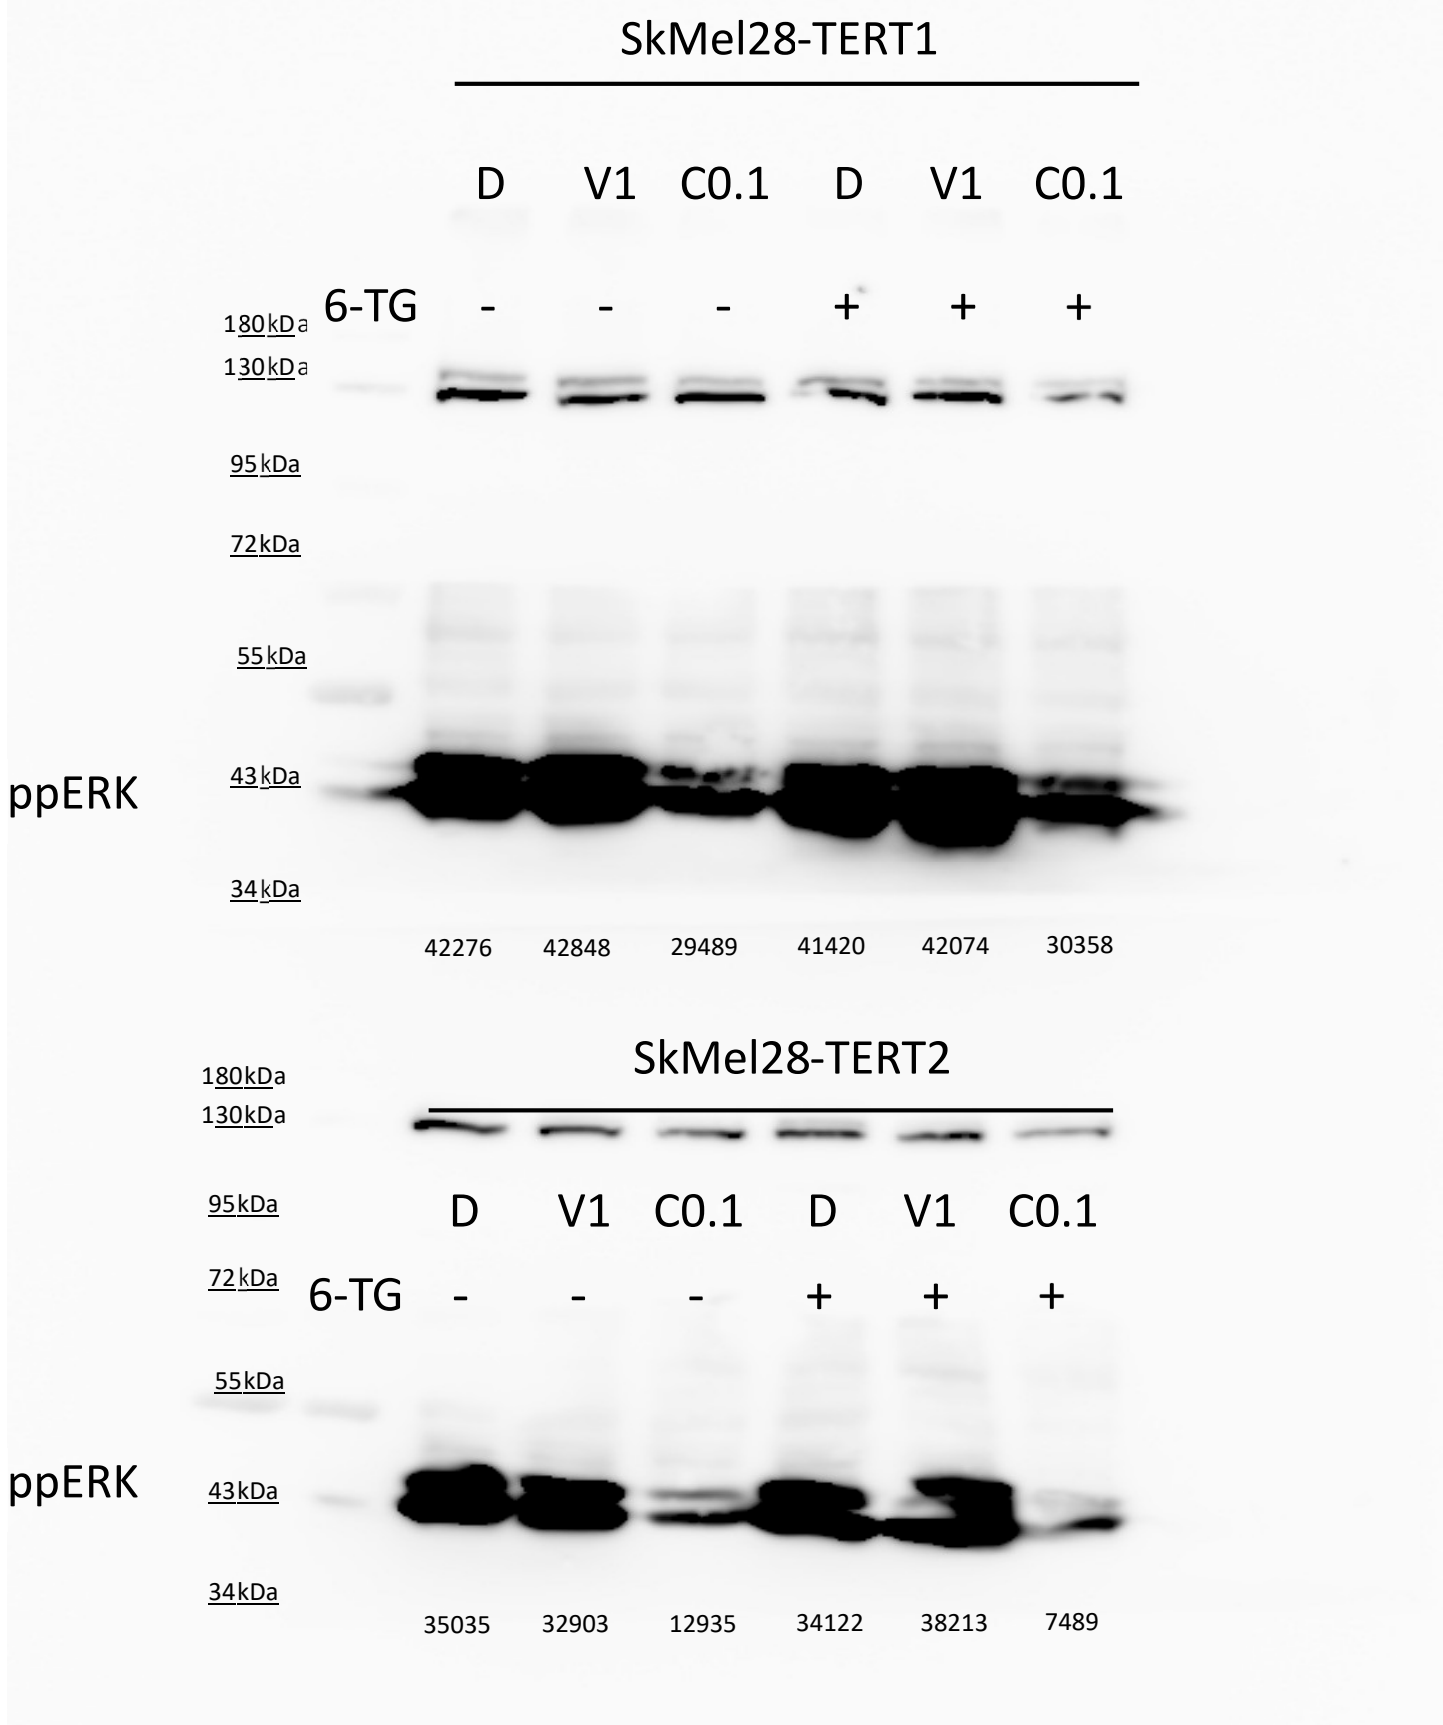

**Supplementary Figure 2:** Uncropped Western blot bands for Figure S2. Quantification of western blots by ImageJ is indicated below each blot.

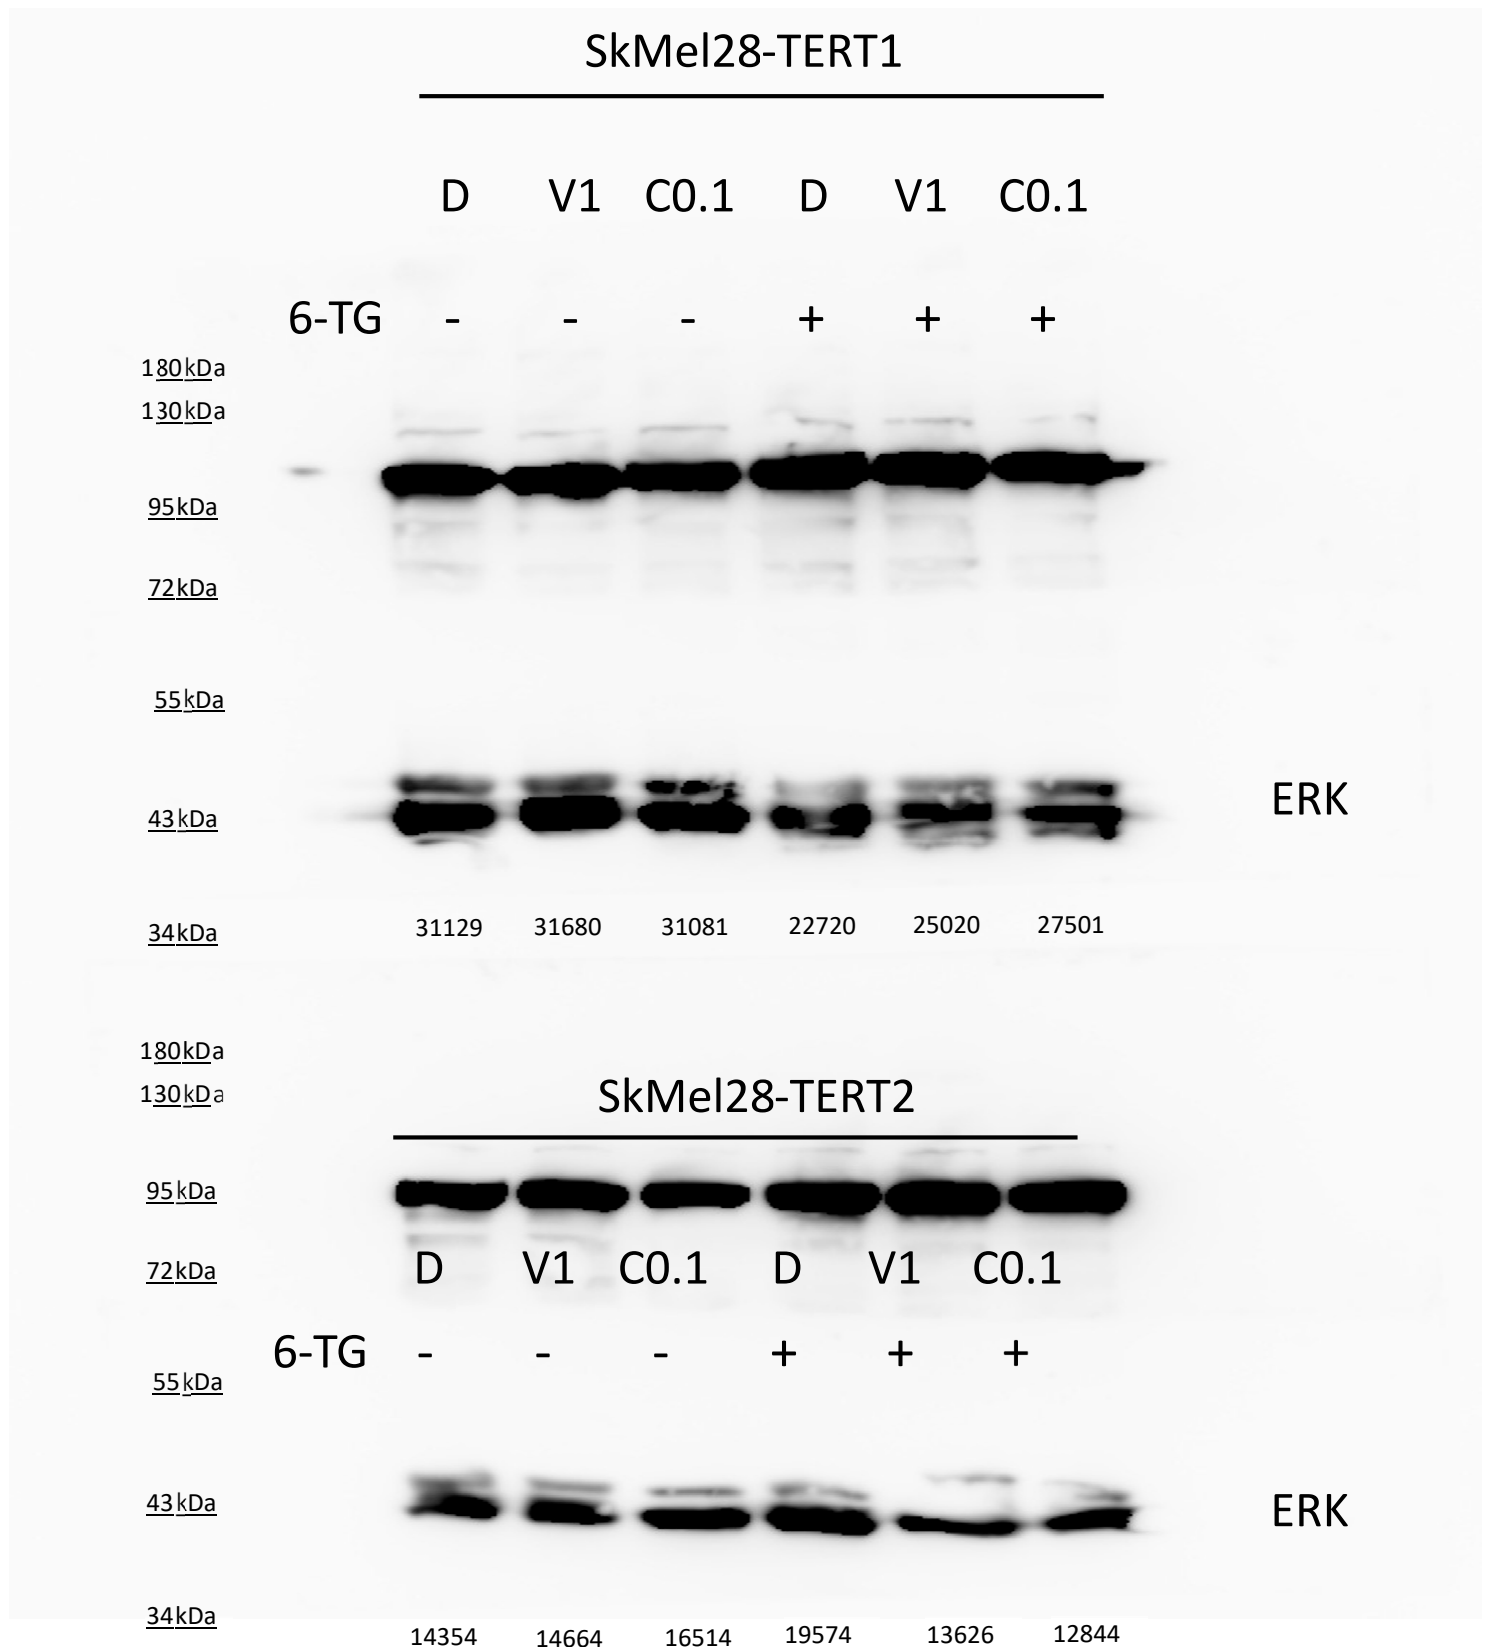

**Supplementary Figure 2:** Uncropped Western blot bands for Figure S2. Quantification of western blots by ImageJ is indicated below each blot.
